# Supplementary material
Source: PubMed Central journal article supplement (PMC3464079)
Supplement: Supp_Fig1.pdf [file Supp_Fig1.pdf]

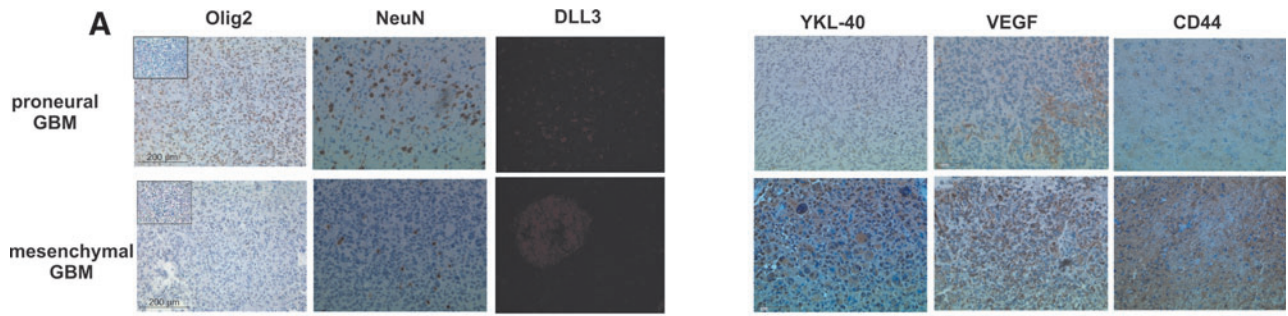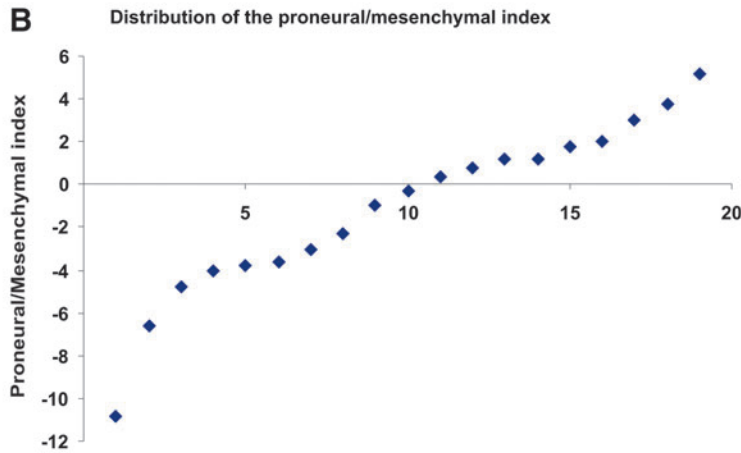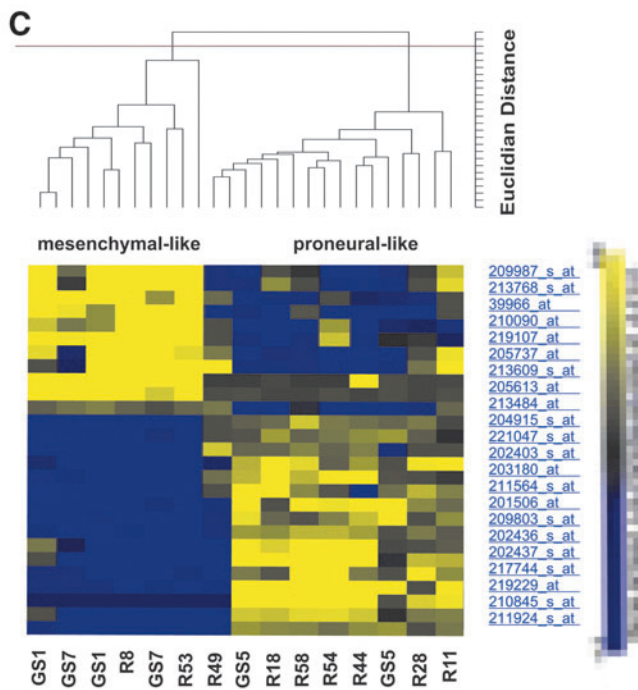

**SUPPLEMENTARY FIG. S1.** (A) Representative stainings for proneural- and mesenchymal glioblastoma (GBM) with markers for the respective subgroup were shown. (B) The distribution of the proneural–mesenchymal index in the tumor samples investigated is given. (C) Genes expression data (Affymetrix U133 plus 2.0) from cancer stem cell (CSC) lines used in this article were clustered using a previously published 24-gene signature that reliably differentiates between proneural-like (CD133<sup>+</sup> type I) and mesenchymal-like (CD133<sup>-</sup> type II) CSC lines [8]. Euclidian distance is given between the subgroups.
